# Supplementary material
Source: MDPI journal article supplement (https://www.mdpi.com/2306-5710/6/4/61)
Supplement: s1 [file s1]

## Supplementary Materials

### Sensory analysis of post-exercise coffee or cocoa milk beverages for endurance athletes

**Table S1.** Acceptance Correspondence of 9 point and 3 point-hedonic scales\*.

| Acceptance<br>(Original) | Acceptance<br>(Recoded) | Frequency | Percent | Cumulative<br>Percent |
|--------------------------|-------------------------|-----------|---------|-----------------------|
| Extremely Dislike        | Dislike                 | 1         | 0.50    | 0.50                  |
| Moderate Dislike         | Dislike                 | 2         | 1.00    | 1.50                  |
| Regular Dislike          | Dislike                 | 2         | 1.00    | 2.50                  |
| Lightly Dislike          | Dislike                 | 5         | 2.50    | 5.00                  |
| Indifferent              | Indifferent             | 12        | 6.00    | 11.00                 |
| Lightly Like             | Like                    | 17        | 8.50    | 19.50                 |
| Regular Like             | Like                    | 39        | 19.50   | 39.00                 |
| Moderate Like            | Like                    | 70        | 35.00   | 74.00                 |
| Extremely Like           | Like                    | 52        | 26.00   | 100.00                |

Note: frequency considering evaluations of both beverages, i.e., a 100 evaluations for each beverage with a total of 200 evaluations

## Supplement 2 – Beverage preparation

**Table S2.** Sample A (Coffee Milk Beverage).

| INGREDIENTS                                                                                                                                                                                                                                                                                                                                                                                                                                                                                                                                                                                                                                                                                                                                                                                                                                    | Weight/<br>Gross<br>volume | Weight/<br>liquid<br>volume | Correction<br>Factor | Per<br>capita | Individual Cost<br>(R\$)* |
|------------------------------------------------------------------------------------------------------------------------------------------------------------------------------------------------------------------------------------------------------------------------------------------------------------------------------------------------------------------------------------------------------------------------------------------------------------------------------------------------------------------------------------------------------------------------------------------------------------------------------------------------------------------------------------------------------------------------------------------------------------------------------------------------------------------------------------------------|----------------------------|-----------------------------|----------------------|---------------|---------------------------|
| Roasted and ground coffee (Melita®)                                                                                                                                                                                                                                                                                                                                                                                                                                                                                                                                                                                                                                                                                                                                                                                                            | 25 g                       | 25 g                        | 1                    | 25 g          | 0.60                      |
| Instant Nonfat Powdered Milk (Piracanjuba®)                                                                                                                                                                                                                                                                                                                                                                                                                                                                                                                                                                                                                                                                                                                                                                                                    | 60 g                       | 60 g                        | 1                    | 60 g          | 1.80                      |
| Crystal Sugar (União®)                                                                                                                                                                                                                                                                                                                                                                                                                                                                                                                                                                                                                                                                                                                                                                                                                         | 54 g                       | 54 g                        | 1                    | 54 g          | 0.20                      |
| Mineral water                                                                                                                                                                                                                                                                                                                                                                                                                                                                                                                                                                                                                                                                                                                                                                                                                                  | 500 mL                     | 500 mL                      | 1                    | 500 mL        | 0.70                      |
| <b>Preparation method</b>                                                                                                                                                                                                                                                                                                                                                                                                                                                                                                                                                                                                                                                                                                                                                                                                                      |                            |                             |                      |               |                           |
| <p>Pre-preparation:</p> <ol style="list-style-type: none"> <li>1- Weigh roasted coffee (25 g) and measure water volume (300 mL);</li> <li>2- Heat the water (300 mL) for 4 min in microwave to the boiling point (approximately 90 °C);</li> <li>3- Filter the coffee with a paper filter;</li> <li>4- Pour the filtered coffee into an ice cube tray (250 mL for each regular tray);</li> <li>5- Put tray of filtered coffee to the freezer for 24 h.</li> </ol> <p>Preparation:</p> <ol style="list-style-type: none"> <li>1- Blend the milk powder (60 g), sugar (54 g), and water (250 mL) for 30 seconds;</li> <li>2- Add all the coffee ice cubes from the tray to the blender and mix for another 2 min;</li> <li>3- After thoroughly homogenizing and mixing the beverage in the blender, the beverage is ready to consume.</li> </ol> |                            |                             |                      |               |                           |
| * Price survey conducted in August 2018. 1 US Dollar = 4.17 Brazilian Real                                                                                                                                                                                                                                                                                                                                                                                                                                                                                                                                                                                                                                                                                                                                                                     |                            |                             |                      |               |                           |

Yield: 1 serving (Approximately 500mL)

Total energy value = 430 kcal

CHO 85.5g; PTN 21.0g; LIP 0.5 g

Carbohydrate/Protein Ratio (4:1) - CHO: 1.2 g/kg body weight/PTN: 0.3g/kg body weight (70 kg individual).

**Table S3. PREPARATION NAME:** Sample B (Cocoa Milk Beverage)

| <b>INGREDIENTS</b>                                                                                                                                                                                                                                                                                                                                                                                                                                                                                                                                                                                                                                                                                                                                                                                                                       | <b>Weight/<br/>Gross<br/>volume</b> | <b>Weight/<br/>net volume</b> | <b>Correction<br/>Factor</b> | <b>Per<br/>capita</b> | <b>Individual Cost<br/>*</b> |
|------------------------------------------------------------------------------------------------------------------------------------------------------------------------------------------------------------------------------------------------------------------------------------------------------------------------------------------------------------------------------------------------------------------------------------------------------------------------------------------------------------------------------------------------------------------------------------------------------------------------------------------------------------------------------------------------------------------------------------------------------------------------------------------------------------------------------------------|-------------------------------------|-------------------------------|------------------------------|-----------------------|------------------------------|
| Pure Cocoa Powder (Mãe-terra <sup>®</sup> )                                                                                                                                                                                                                                                                                                                                                                                                                                                                                                                                                                                                                                                                                                                                                                                              | 25 g                                | 25 g                          | 1                            | 25 g                  | 1.50                         |
| Instant Nonfat Powdered Milk (Piracanjuba <sup>®</sup> )                                                                                                                                                                                                                                                                                                                                                                                                                                                                                                                                                                                                                                                                                                                                                                                 | 60 g                                | 60 g                          | 1                            | 60 g                  | 1.80                         |
| Crystal Sugar (União <sup>®</sup> )                                                                                                                                                                                                                                                                                                                                                                                                                                                                                                                                                                                                                                                                                                                                                                                                      | 54 g                                | 54 g                          | 1                            | 54 g                  | 0.20                         |
| Mineral water                                                                                                                                                                                                                                                                                                                                                                                                                                                                                                                                                                                                                                                                                                                                                                                                                            | 500 mL                              | 500 mL                        | 1                            | 500 mL                | 0.70                         |
| <b>Preparation method</b>                                                                                                                                                                                                                                                                                                                                                                                                                                                                                                                                                                                                                                                                                                                                                                                                                |                                     |                               |                              |                       |                              |
| Pre-preparation:<br><ol style="list-style-type: none"><li>1- Weigh cocoa powder (25 g) and measure water volume (250 mL);</li><li>2- Heat mineral water (250 mL) for 2 min in microwave to the point of heating. (approximately 60 °C)</li><li>3- Mix the cocoa powder (25 g) with warm water (250 mL) in a blender for 1 min;</li><li>4- Pour the mixed cocoa in ice cube tray (250 mL for each regular tray);</li><li>5- Take tray of mixed cocoa to the freezer for 24 h.</li></ol> Preparation:<br><ol style="list-style-type: none"><li>1- Blend the milk powder (60 g), sugar (54 g), and water (250 mL) for 30 seconds;</li><li>2- Add the cocoa ice cubes to the blender and mix for another 2 min;</li><li>3- After thoroughly homogenizing and mixing the beverage in the blender, the beverage is ready to consume.</li></ol> |                                     |                               |                              |                       |                              |
| * Price survey conducted in August 2018. 1 US Dollar = 4.17 Brazilian Real                                                                                                                                                                                                                                                                                                                                                                                                                                                                                                                                                                                                                                                                                                                                                               |                                     |                               |                              |                       |                              |

Yield: 1 serving (Approximately 500 mL)

Total Energy Value = 485 kcal

CHO 90.0g; PTN 25.0g; LIP 3.0g

Carbohydrate/Protein Ratio (4:1) - CHO: 1.2 g/kg body weight/PTN: 0.3g/kg body weight (70 kg individual).
